# Supplementary material
Source: PubMed Central journal article supplement (PMC6643677)
Supplement: ao7b00274_si_002.pdf [file ao7b00274_si_002.pdf]

# Experimental errors in QSAR modeling sets: what we can do and what we cannot do

*Linlin Zhao<sup>†</sup>, Wenyi Wang<sup>†</sup>, Alexander Sedykh<sup>\*‡</sup>, and Hao Zhu<sup>\*, †, §</sup>*

<sup>†</sup> The Rutgers Center for Computational and Integrative Biology, Camden, New Jersey 08102, USA;

<sup>‡</sup> Sciome LLC, Durham, North Carolina 27709, USA

<sup>§</sup> Department of Chemistry, Rutgers University, Camden, New Jersey 08102, USA

\*Corresponding author:

Hao Zhu:

315 Penn St.

Rutgers University

Camden, NJ 08102

Telephone: (856) 225-6781

Email: [hao.zhu99@rutgers.edu](mailto:hao.zhu99@rutgers.edu)

Alexander Sedykh:

2 Davis Drive

Sciome LLC

Research Triangle Park, Durham, North Carolina 27709

KEYWORDS: QSAR; Database; Experimental Error; Consensus Modeling; Modeling Set

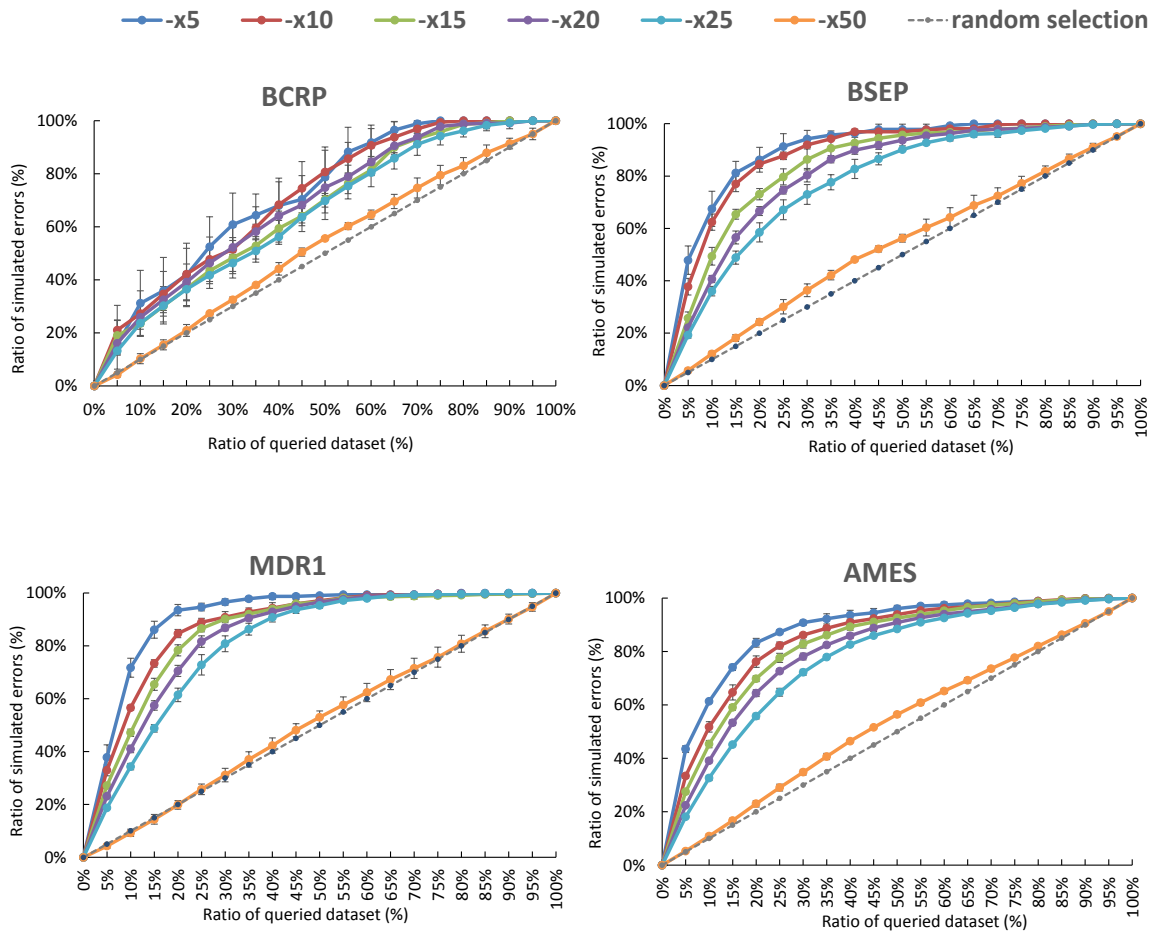

**Figure S1.** AUC plots for categorical datasets.

## Strategy 1

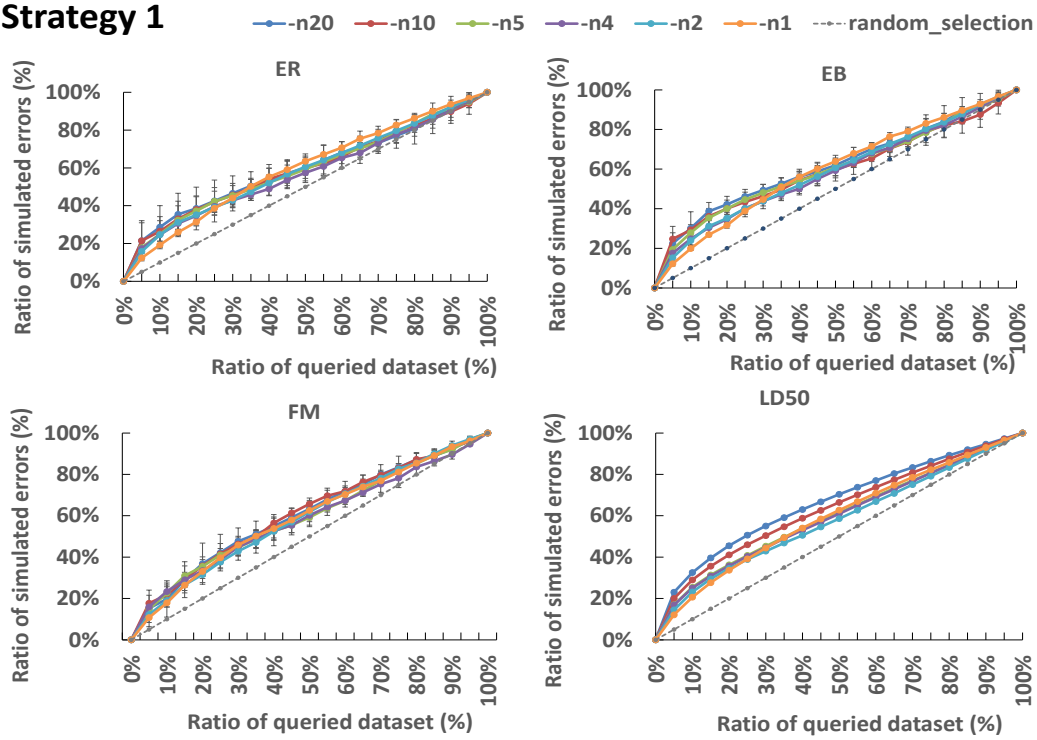

## Strategy 2

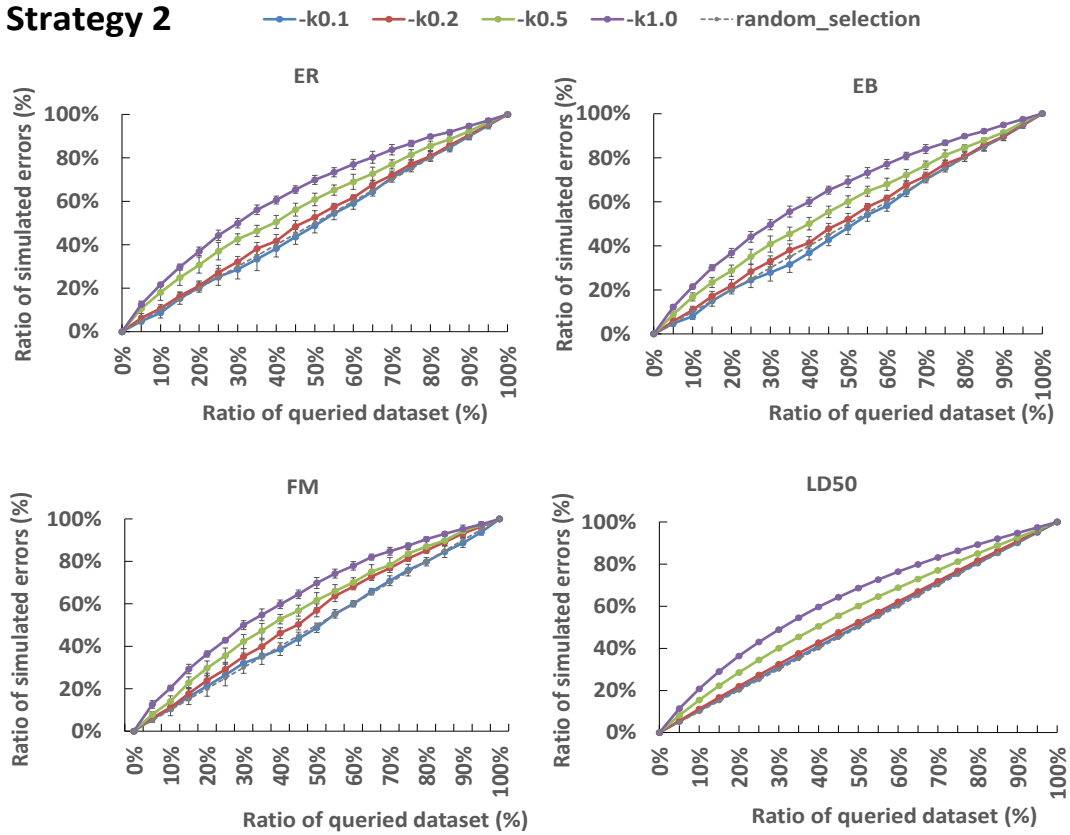

Figure S2. AUC plots for continuous datasets.

**Table S1** Five-fold cross-validation results for categorical datasets

| Model   |                   |            | BCRP        |             |       | BSEP        |             |       | MDR1        |             |       | AMES        |             |       |
|---------|-------------------|------------|-------------|-------------|-------|-------------|-------------|-------|-------------|-------------|-------|-------------|-------------|-------|
|         |                   |            | Sensitivity | Specificity | CCR   |
| Control | Individual models | MOE_RF     | 0.750       | 0.823       | 0.787 | 0.831       | 0.883       | 0.857 | 0.903       | 0.891       | 0.897 | 0.747       | 0.883       | 0.815 |
|         |                   | MOE_SVM    | 0.459       | 0.801       | 0.630 | 0.791       | 0.857       | 0.824 | 0.853       | 0.858       | 0.855 | 0.715       | 0.822       | 0.768 |
|         |                   | Dragon_RF  | 0.743       | 0.829       | 0.786 | 0.803       | 0.871       | 0.837 | 0.905       | 0.891       | 0.898 | 0.737       | 0.879       | 0.808 |
|         |                   | Dragon_SVM | 0.486       | 0.845       | 0.666 | 0.791       | 0.840       | 0.816 | 0.913       | 0.838       | 0.875 | 0.541       | 0.886       | 0.713 |
|         | Consensus model   | 0.649      | 0.851       | 0.750       | 0.827 | 0.871       | 0.849       | 0.916 | 0.871       | 0.894       | 0.727 | 0.893       | 0.810       |       |
| -x5     | Individual models | MOE_RF     | 0.721       | 0.802       | 0.762 | 0.798       | 0.858       | 0.828 | 0.852       | 0.848       | 0.850 | 0.697       | 0.858       | 0.777 |
|         |                   | MOE_SVM    | 0.367       | 0.846       | 0.607 | 0.710       | 0.852       | 0.781 | 0.812       | 0.822       | 0.817 | 0.685       | 0.800       | 0.742 |
|         |                   | Dragon_RF  | 0.680       | 0.791       | 0.736 | 0.742       | 0.849       | 0.796 | 0.851       | 0.830       | 0.841 | 0.704       | 0.843       | 0.773 |
|         |                   | Dragon_SVM | 0.463       | 0.830       | 0.646 | 0.714       | 0.818       | 0.766 | 0.876       | 0.779       | 0.828 | 0.492       | 0.884       | 0.688 |
|         | Consensus model   | 0.585      | 0.824       | 0.705       | 0.774 | 0.847       | 0.810       | 0.871 | 0.822       | 0.846       | 0.684 | 0.874       | 0.779       |       |
| -x10    | Individual models | MOE_RF     | 0.664       | 0.767       | 0.716 | 0.731       | 0.849       | 0.790 | 0.797       | 0.823       | 0.810 | 0.668       | 0.834       | 0.751 |
|         |                   | MOE_SVM    | 0.275       | 0.878       | 0.576 | 0.648       | 0.849       | 0.749 | 0.748       | 0.804       | 0.776 | 0.661       | 0.780       | 0.721 |
|         |                   | Dragon_RF  | 0.624       | 0.733       | 0.679 | 0.711       | 0.815       | 0.763 | 0.796       | 0.810       | 0.803 | 0.652       | 0.828       | 0.740 |
|         |                   | Dragon_SVM | 0.389       | 0.844       | 0.617 | 0.648       | 0.803       | 0.726 | 0.816       | 0.766       | 0.791 | 0.400       | 0.890       | 0.645 |
|         | Consensus model   | 0.463      | 0.839       | 0.651       | 0.700 | 0.829       | 0.764       | 0.819 | 0.800       | 0.810       | 0.635 | 0.849       | 0.742       |       |
| -x15    | Individual models | MOE_RF     | 0.634       | 0.783       | 0.709 | 0.675       | 0.817       | 0.746 | 0.772       | 0.792       | 0.782 | 0.629       | 0.806       | 0.718 |
|         |                   | MOE_SVM    | 0.214       | 0.940       | 0.577 | 0.580       | 0.862       | 0.721 | 0.758       | 0.775       | 0.766 | 0.630       | 0.760       | 0.695 |
|         |                   | Dragon_RF  | 0.614       | 0.788       | 0.701 | 0.631       | 0.794       | 0.713 | 0.771       | 0.758       | 0.764 | 0.613       | 0.795       | 0.704 |
|         |                   | Dragon_SVM | 0.338       | 0.875       | 0.606 | 0.608       | 0.794       | 0.701 | 0.790       | 0.740       | 0.765 | 0.410       | 0.861       | 0.635 |
|         | Consensus model   | 0.434      | 0.902       | 0.668       | 0.643 | 0.831       | 0.737       | 0.795 | 0.755       | 0.775       | 0.602 | 0.832       | 0.717       |       |
| -x20    | Individual models | MOE_RF     | 0.662       | 0.729       | 0.696 | 0.612       | 0.769       | 0.691 | 0.704       | 0.779       | 0.741 | 0.587       | 0.796       | 0.692 |
|         |                   | MOE_SVM    | 0.257       | 0.895       | 0.576 | 0.516       | 0.855       | 0.685 | 0.733       | 0.740       | 0.736 | 0.611       | 0.743       | 0.677 |
|         |                   | Dragon_RF  | 0.662       | 0.740       | 0.701 | 0.605       | 0.763       | 0.684 | 0.686       | 0.761       | 0.724 | 0.566       | 0.781       | 0.674 |
|         |                   | Dragon_SVM | 0.405       | 0.801       | 0.603 | 0.469       | 0.824       | 0.646 | 0.731       | 0.718       | 0.725 | 0.358       | 0.882       | 0.620 |
|         | Consensus model   | 0.493      | 0.823       | 0.658       | 0.574 | 0.821       | 0.697       | 0.741 | 0.741       | 0.741       | 0.552 | 0.823       | 0.687       |       |
| -x25    | Individual models | MOE_RF     | 0.578       | 0.736       | 0.657 | 0.585       | 0.755       | 0.670 | 0.668       | 0.776       | 0.722 | 0.536       | 0.765       | 0.650 |
|         |                   | MOE_SVM    | 0.238       | 0.912       | 0.575 | 0.316       | 0.860       | 0.588 | 0.646       | 0.726       | 0.686 | 0.581       | 0.722       | 0.651 |
|         |                   | Dragon_RF  | 0.626       | 0.670       | 0.648 | 0.605       | 0.729       | 0.667 | 0.652       | 0.745       | 0.699 | 0.508       | 0.758       | 0.633 |
|         |                   | Dragon_SVM | 0.333       | 0.846       | 0.590 | 0.407       | 0.823       | 0.615 | 0.644       | 0.721       | 0.683 | 0.218       | 0.909       | 0.564 |

|             |                          |                   |       |       |       |       |       |       |       |       |       |       |       |       |
|-------------|--------------------------|-------------------|-------|-------|-------|-------|-------|-------|-------|-------|-------|-------|-------|-------|
|             | <b>Consensus model</b>   |                   | 0.361 | 0.857 | 0.609 | 0.486 | 0.818 | 0.652 | 0.684 | 0.754 | 0.719 | 0.480 | 0.820 | 0.650 |
| <b>-x50</b> | <b>Individual models</b> | <b>MOE_RF</b>     | 0.442 | 0.566 | 0.504 | 0.246 | 0.750 | 0.498 | 0.459 | 0.568 | 0.513 | 0.324 | 0.711 | 0.517 |
|             |                          | <b>MOE_SVM</b>    | 0.130 | 0.909 | 0.519 | 0.004 | 1.000 | 0.502 | 0.050 | 0.950 | 0.500 | 0.000 | 1.000 | 0.500 |
|             |                          | <b>Dragon_RF</b>  | 0.409 | 0.560 | 0.485 | 0.213 | 0.728 | 0.470 | 0.456 | 0.585 | 0.520 | 0.305 | 0.703 | 0.504 |
|             |                          | <b>Dragon_SVM</b> | 0.136 | 0.869 | 0.502 | 0.000 | 1.000 | 0.500 | 0.000 | 1.000 | 0.500 | 0.000 | 1.000 | 0.500 |
|             | <b>Consensus model</b>   |                   | 0.201 | 0.851 | 0.526 | 0.004 | 0.994 | 0.499 | 0.034 | 0.964 | 0.499 | 0.001 | 1.000 | 0.500 |

**Table S2** Five-fold cross-validation results for continuous datasets

| Model   |                   |            | ER     |                | FM    |                | EB     |                | LD50  |                |
|---------|-------------------|------------|--------|----------------|-------|----------------|--------|----------------|-------|----------------|
|         |                   |            | MAE    | R <sup>2</sup> | MAE   | R <sup>2</sup> | MAE    | R <sup>2</sup> | MAE   | R <sup>2</sup> |
| Control | Individual models | MOE_RF     | 0.668  | 0.833          | 0.614 | 0.774          | 0.575  | 0.776          | 0.457 | 0.762          |
|         |                   | MOE_SVM    | 0.823  | 0.732          | 0.735 | 0.686          | 0.841  | 0.652          | 0.581 | 0.578          |
|         |                   | Dragon_RF  | 0.730  | 0.803          | 0.643 | 0.753          | 0.595  | 0.764          | 0.459 | 0.757          |
|         |                   | Dragon_SVM | 1.066  | 0.643          | 0.773 | 0.693          | 0.706  | 0.718          | 0.555 | 0.615          |
|         | Consensus model   | 0.773      | 0.807  | 0.659          | 0.766 | 0.637          | 0.776  | 0.492          | 0.730 |                |
| -n20    | Individual models | MOE_RF     | 0.676  | 0.827          | 0.632 | 0.757          | 0.583  | 0.768          | 0.463 | 0.755          |
|         |                   | MOE_SVM    | 0.826  | 0.736          | 0.746 | 0.683          | 0.843  | 0.625          | 0.583 | 0.577          |
|         |                   | Dragon_RF  | 0.747  | 0.796          | 0.653 | 0.741          | 0.601  | 0.750          | 0.466 | 0.752          |
|         |                   | Dragon_SVM | 1.072  | 0.638          | 0.775 | 0.687          | 0.713  | 0.696          | 0.557 | 0.617          |
|         | Consensus model   | 0.777      | 0.804  | 0.665          | 0.758 | 0.641          | 0.762  | 0.495          | 0.727 |                |
| -n10    | Individual models | MOE_RF     | 0.693  | 0.824          | 0.637 | 0.757          | 0.596  | 0.751          | 0.474 | 0.738          |
|         |                   | MOE_SVM    | 0.835  | 0.731          | 0.760 | 0.672          | 0.842  | 0.617          | 0.583 | 0.567          |
|         |                   | Dragon_RF  | 0.757  | 0.792          | 0.663 | 0.736          | 0.614  | 0.741          | 0.476 | 0.738          |
|         |                   | Dragon_SVM | 1.073  | 0.630          | 0.786 | 0.673          | 0.708  | 0.682          | 0.560 | 0.603          |
|         | Consensus model   | 0.786      | 0.801  | 0.672          | 0.751 | 0.640          | 0.751  | 0.500          | 0.712 |                |
| -n5     | Individual models | MOE_RF     | 0.757  | 0.766          | 0.701 | 0.692          | 0.654  | 0.685          | 0.513 | 0.678          |
|         |                   | MOE_SVM    | 0.894  | 0.667          | 0.792 | 0.614          | 0.840  | 0.585          | 0.593 | 0.530          |
|         |                   | Dragon_RF  | 0.820  | 0.742          | 0.721 | 0.681          | 0.656  | 0.683          | 0.511 | 0.679          |
|         |                   | Dragon_SVM | 1.072  | 0.595          | 0.818 | 0.615          | 0.737  | 0.637          | 0.572 | 0.566          |
|         | Consensus model   | 0.837      | 0.746  | 0.718          | 0.691 | 0.666          | 0.695  | 0.523          | 0.660 |                |
| -n4     | Individual models | MOE_RF     | 0.807  | 0.726          | 0.760 | 0.651          | 0.702  | 0.647          | 0.533 | 0.653          |
|         |                   | MOE_SVM    | 0.924  | 0.629          | 0.807 | 0.596          | 0.857  | 0.538          | 0.602 | 0.515          |
|         |                   | Dragon_RF  | 0.863  | 0.693          | 0.779 | 0.624          | 0.720  | 0.621          | 0.537 | 0.647          |
|         |                   | Dragon_SVM | 1.090  | 0.546          | 0.824 | 0.593          | 0.764  | 0.571          | 0.586 | 0.538          |
|         | Consensus model   | 0.870      | 0.703  | 0.759          | 0.653 | 0.700          | 0.645  | 0.541          | 0.634 |                |
| -n2     | Individual models | MOE_RF     | 0.990  | 0.566          | 0.910 | 0.462          | 0.804  | 0.414          | 0.647 | 0.440          |
|         |                   | MOE_SVM    | 1.047  | 0.487          | 0.949 | 0.388          | 0.861  | 0.359          | 0.662 | 0.346          |
|         |                   | Dragon_RF  | 1.027  | 0.540          | 0.925 | 0.440          | 0.825  | 0.379          | 0.648 | 0.438          |
|         |                   | Dragon_SVM | 1.141  | 0.448          | 0.941 | 0.429          | 0.825  | 0.363          | 0.656 | 0.354          |
|         | Consensus model   | 1.010      | 0.565  | 0.897          | 0.470 | 0.794          | 0.417  | 0.633          | 0.440 |                |
| -n1     | Individual models | MOE_RF     | 1.428  | 0.022          | 1.094 | 0.017          | 0.997  | -0.008         | 0.772 | 0.008          |
|         |                   | MOE_SVM    | 1.377  | -0.013         | 1.068 | 0.020          | 0.945  | -0.006         | 0.734 | 0.000          |
|         |                   | Dragon_RF  | 1.441  | -0.049         | 1.093 | 0.036          | 0.996  | -0.024         | 0.774 | 0.016          |
|         |                   | Dragon_SVM | 1.348  | 0.026          | 1.062 | -0.047         | 0.953  | -0.065         | 0.745 | -0.003         |
|         | Consensus model   | 1.380      | -0.010 | 1.064          | 0.023 | 0.960          | -0.024 | 0.744          | 0.010 |                |
| -k0.1   | Individual models | MOE_RF     | 0.673  | 0.831          | 0.623 | 0.771          | 0.586  | 0.771          | 0.465 | 0.756          |
|         |                   | MOE_SVM    | 0.814  | 0.740          | 0.746 | 0.684          | 0.844  | 0.657          | 0.586 | 0.574          |
|         |                   | Dragon_RF  | 0.738  | 0.801          | 0.665 | 0.744          | 0.604  | 0.764          | 0.468 | 0.753          |
|         |                   | Dragon_SVM | 1.063  | 0.647          | 0.781 | 0.692          | 0.714  | 0.718          | 0.562 | 0.610          |
|         | Consensus model   | 0.779      | 0.809  | 0.671          | 0.762 | 0.646          | 0.774  | 0.499          | 0.726 |                |
| -k0.2   | Individual models | MOE_RF     | 0.715  | 0.824          | 0.669 | 0.751          | 0.629  | 0.753          | 0.488 | 0.746          |
|         |                   | MOE_SVM    | 0.869  | 0.732          | 0.764 | 0.674          | 0.875  | 0.639          | 0.604 | 0.570          |
|         |                   | Dragon_RF  | 0.772  | 0.800          | 0.686 | 0.736          | 0.630  | 0.754          | 0.492 | 0.739          |

|              |                          |                        |       |       |       |       |       |       |       |       |
|--------------|--------------------------|------------------------|-------|-------|-------|-------|-------|-------|-------|-------|
|              |                          | <b>Dragon_SVM</b>      | 1.128 | 0.641 | 0.809 | 0.684 | 0.752 | 0.702 | 0.582 | 0.600 |
|              |                          | <b>Consensus model</b> | 0.818 | 0.806 | 0.697 | 0.752 | 0.680 | 0.760 | 0.520 | 0.715 |
| <b>-k0.5</b> | <b>Individual models</b> | <b>MOE_RF</b>          | 0.938 | 0.736 | 0.835 | 0.696 | 0.794 | 0.660 | 0.616 | 0.671 |
|              |                          | <b>MOE_SVM</b>         | 1.017 | 0.663 | 0.907 | 0.629 | 0.969 | 0.576 | 0.706 | 0.528 |
|              |                          | <b>Dragon_RF</b>       | 1.013 | 0.678 | 0.882 | 0.668 | 0.816 | 0.637 | 0.622 | 0.665 |
|              |                          | <b>Dragon_SVM</b>      | 1.232 | 0.583 | 0.942 | 0.637 | 0.870 | 0.613 | 0.694 | 0.540 |
|              |                          | <b>Consensus model</b> | 0.996 | 0.717 | 0.858 | 0.697 | 0.824 | 0.661 | 0.638 | 0.651 |
| <b>-k1.0</b> | <b>Individual models</b> | <b>MOE_RF</b>          | 1.413 | 0.563 | 1.406 | 0.498 | 1.164 | 0.485 | 0.915 | 0.507 |
|              |                          | <b>MOE_SVM</b>         | 1.454 | 0.523 | 1.435 | 0.444 | 1.290 | 0.421 | 0.969 | 0.404 |
|              |                          | <b>Dragon_RF</b>       | 1.441 | 0.544 | 1.421 | 0.484 | 1.165 | 0.483 | 0.918 | 0.501 |
|              |                          | <b>Dragon_SVM</b>      | 1.599 | 0.448 | 1.486 | 0.455 | 1.201 | 0.478 | 0.972 | 0.397 |
|              |                          | <b>Consensus model</b> | 1.420 | 0.573 | 1.398 | 0.510 | 1.163 | 0.505 | 0.923 | 0.500 |



**Table S3** External prediction results for categorical datasets

| Model       | BCRP           |             |                  | BSEP           |             |                  | MDR1           |             |                  | AMES           |             |                  |
|-------------|----------------|-------------|------------------|----------------|-------------|------------------|----------------|-------------|------------------|----------------|-------------|------------------|
|             | CCR without AD | CCR with AD | Coverage with AD | CCR without AD | CCR with AD | Coverage with AD | CCR without AD | CCR with AD | Coverage with AD | CCR without AD | CCR with AD | Coverage with AD |
| Control     | 0.76           | 0.76        | 0.68             | 0.89           | 0.85        | 0.69             | 0.92           | 0.92        | 0.68             | 0.82           | 0.85        | 0.72             |
| Control-r5  | 0.74           | 0.71        | 0.68             | 0.87           | 0.83        | 0.69             | 0.92           | 0.96        | 0.31             | 0.82           | 0.86        | 0.72             |
| Control-r10 | 0.74           | 0.74        | 0.65             | 0.85           | 0.82        | 0.67             | 0.91           | 0.96        | 0.31             | 0.82           | 0.87        | 0.71             |
| Control-r15 | 0.67           | 0.65        | 0.65             | 0.82           | 0.80        | 0.68             | 0.90           | 0.96        | 0.31             | 0.82           | 0.86        | 0.81             |
| Control-r20 | 0.65           | 0.66        | 0.65             | 0.80           | 0.79        | 0.65             | 0.90           | 0.96        | 0.30             | 0.80           | 0.85        | 0.80             |
| -x5         | 0.78           | 0.80        | 0.68             | 0.88           | 0.85        | 0.69             | 0.92           | 0.92        | 0.68             | 0.83           | 0.86        | 0.72             |
| -x5-r5      | 0.75           | 0.76        | 0.68             | 0.88           | 0.85        | 0.69             | 0.92           | 0.96        | 0.31             | 0.82           | 0.86        | 0.72             |
| -x5-r10     | 0.70           | 0.71        | 0.65             | 0.87           | 0.86        | 0.67             | 0.91           | 0.96        | 0.31             | 0.82           | 0.87        | 0.71             |
| -x5-r15     | 0.68           | 0.69        | 0.65             | 0.83           | 0.81        | 0.68             | 0.90           | 0.96        | 0.31             | 0.82           | 0.85        | 0.81             |
| -x5-r20     | 0.68           | 0.68        | 0.65             | 0.82           | 0.80        | 0.65             | 0.90           | 0.97        | 0.30             | 0.80           | 0.85        | 0.80             |
| -x10        | 0.79           | 0.80        | 0.68             | 0.89           | 0.86        | 0.69             | 0.89           | 0.89        | 0.68             | 0.80           | 0.84        | 0.72             |
| -x10-r5     | 0.74           | 0.76        | 0.68             | 0.89           | 0.86        | 0.69             | 0.89           | 0.95        | 0.31             | 0.80           | 0.84        | 0.72             |
| -x10-r10    | 0.65           | 0.62        | 0.65             | 0.88           | 0.86        | 0.67             | 0.88           | 0.94        | 0.31             | 0.80           | 0.84        | 0.71             |
| -x10-r15    | 0.63           | 0.63        | 0.65             | 0.85           | 0.83        | 0.68             | 0.89           | 0.95        | 0.31             | 0.80           | 0.84        | 0.81             |
| -x10-r20    | 0.63           | 0.64        | 0.65             | 0.85           | 0.84        | 0.65             | 0.88           | 0.96        | 0.30             | 0.80           | 0.84        | 0.80             |
| -x15        | 0.63           | 0.63        | 0.68             | 0.83           | 0.83        | 0.69             | 0.88           | 0.87        | 0.68             | 0.81           | 0.84        | 0.72             |
| -x15-r5     | 0.64           | 0.64        | 0.68             | 0.83           | 0.83        | 0.69             | 0.90           | 0.95        | 0.31             | 0.82           | 0.85        | 0.72             |
| -x15-r10    | 0.59           | 0.59        | 0.65             | 0.84           | 0.83        | 0.67             | 0.90           | 0.95        | 0.31             | 0.80           | 0.85        | 0.71             |
| -x15-r15    | 0.59           | 0.59        | 0.65             | 0.84           | 0.82        | 0.68             | 0.90           | 0.95        | 0.31             | 0.81           | 0.84        | 0.81             |
| -x15-r20    | 0.59           | 0.61        | 0.65             | 0.84           | 0.80        | 0.65             | 0.89           | 0.96        | 0.30             | 0.80           | 0.84        | 0.80             |
| -x20        | 0.77           | 0.76        | 0.68             | 0.89           | 0.86        | 0.69             | 0.87           | 0.88        | 0.68             | 0.80           | 0.83        | 0.72             |
| -x20-r5     | 0.71           | 0.72        | 0.68             | 0.87           | 0.85        | 0.69             | 0.87           | 0.95        | 0.31             | 0.79           | 0.83        | 0.72             |
| -x20-r10    | 0.68           | 0.68        | 0.65             | 0.90           | 0.87        | 0.67             | 0.87           | 0.94        | 0.31             | 0.79           | 0.83        | 0.71             |
| -x20-r15    | 0.64           | 0.63        | 0.65             | 0.88           | 0.84        | 0.68             | 0.89           | 0.95        | 0.31             | 0.78           | 0.82        | 0.81             |
| -x20-r20    | 0.61           | 0.62        | 0.65             | 0.85           | 0.82        | 0.65             | 0.88           | 0.96        | 0.30             | 0.79           | 0.84        | 0.80             |
| -x25        | 0.71           | 0.72        | 0.68             | 0.82           | 0.81        | 0.69             | 0.85           | 0.84        | 0.68             | 0.79           | 0.82        | 0.72             |
| -x25-r5     | 0.67           | 0.68        | 0.68             | 0.82           | 0.78        | 0.69             | 0.85           | 0.91        | 0.31             | 0.79           | 0.82        | 0.72             |
| -x25-r10    | 0.59           | 0.59        | 0.65             | 0.81           | 0.78        | 0.67             | 0.87           | 0.93        | 0.31             | 0.79           | 0.83        | 0.71             |
| -x25-r15    | 0.59           | 0.59        | 0.65             | 0.80           | 0.75        | 0.68             | 0.87           | 0.93        | 0.31             | 0.79           | 0.82        | 0.81             |
| -x25-r20    | 0.61           | 0.60        | 0.65             | 0.82           | 0.80        | 0.65             | 0.87           | 0.94        | 0.30             | 0.78           | 0.82        | 0.80             |
| -x50        | 0.41           | 0.43        | 0.68             | 0.45           | 0.47        | 0.69             | 0.40           | 0.41        | 0.68             | 0.50           | 0.50        | 0.72             |
| -x50-r5     | 0.42           | 0.43        | 0.68             | 0.47           | 0.50        | 0.69             | 0.40           | 0.04        | 0.31             | 0.50           | 0.50        | 0.72             |
| -x50-r10    | 0.43           | 0.45        | 0.65             | 0.49           | 0.49        | 0.67             | 0.42           | 0.53        | 0.31             | 0.50           | 0.50        | 0.71             |
| -x50-r15    | 0.47           | 0.47        | 0.65             | 0.49           | 0.49        | 0.68             | 0.49           | 0.50        | 0.31             | 0.50           | 0.50        | 0.81             |
| -x50-r20    | 0.51           | 0.52        | 0.65             | 0.49           | 0.49        | 0.65             | 0.49           | 0.50        | 0.30             | 0.50           | 0.50        | 0.80             |

**Table S4** External prediction results for continuous datasets

| Model       | ER             |             |                  | FM             |             |                  | EB             |             |                  | LD50           |             |                  |
|-------------|----------------|-------------|------------------|----------------|-------------|------------------|----------------|-------------|------------------|----------------|-------------|------------------|
|             | MAE without AD | MAE with AD | Coverage with AD | MAE without AD | MAE with AD | Coverage with AD | MAE without AD | MAE with AD | Coverage with AD | MAE without AD | MAE with AD | Coverage with AD |
| Control     | 0.74           | 0.60        | 0.83             | 0.57           | 0.68        | 0.89             | 0.63           | 0.53        | 0.89             | 0.48           | 0.44        | 0.76             |
| Control-r5  | 0.74           | 0.60        | 0.83             | 0.57           | 0.68        | 0.89             | 0.63           | 0.53        | 0.89             | 0.48           | 0.44        | 0.76             |
| Control-r10 | 0.74           | 0.60        | 0.83             | 0.57           | 0.68        | 0.89             | 0.63           | 0.53        | 0.89             | 0.48           | 0.44        | 0.76             |
| Control-r15 | 0.74           | 0.60        | 0.83             | 0.57           | 0.68        | 0.89             | 0.63           | 0.53        | 0.89             | 0.48           | 0.44        | 0.76             |
| Control-r20 | 0.74           | 0.60        | 0.83             | 0.57           | 0.68        | 0.89             | 0.63           | 0.53        | 0.89             | 0.48           | 0.44        | 0.76             |
| -n20        | 0.75           | 0.67        | 0.84             | 0.57           | 0.51        | 0.84             | 0.63           | 0.59        | 0.75             | 0.48           | 0.55        | 0.84             |
| -n20-r5     | 0.77           | 0.67        | 0.84             | 0.70           | 0.63        | 0.84             | 0.63           | 0.69        | 0.75             | 0.49           | 0.58        | 0.84             |
| -n20-r10    | 0.78           | 0.68        | 0.84             | 0.72           | 0.60        | 0.84             | 0.63           | 0.69        | 0.75             | 0.52           | 0.57        | 0.84             |
| -n20-r15    | 0.80           | 0.65        | 0.84             | 0.72           | 0.59        | 0.84             | 0.63           | 0.69        | 0.75             | 0.54           | 0.56        | 0.84             |
| -n20-r20    | 0.82           | 0.64        | 0.84             | 0.72           | 0.59        | 0.84             | 0.68           | 0.66        | 0.75             | 0.55           | 0.54        | 0.84             |
| -n10        | 0.75           | 0.68        | 0.84             | 0.58           | 0.52        | 0.84             | 0.61           | 0.58        | 0.75             | 0.48           | 0.44        | 0.68             |
| -n10-r5     | 0.77           | 0.69        | 0.84             | 0.63           | 0.67        | 0.84             | 0.62           | 0.69        | 0.75             | 0.51           | 0.61        | 0.68             |
| -n10-r10    | 0.80           | 0.66        | 0.84             | 0.70           | 0.62        | 0.84             | 0.67           | 0.67        | 0.75             | 0.52           | 0.57        | 0.68             |
| -n10-r15    | 0.80           | 0.66        | 0.84             | 0.72           | 0.61        | 0.84             | 0.68           | 0.66        | 0.75             | 0.53           | 0.56        | 0.68             |
| -n10-r20    | 0.83           | 0.64        | 0.84             | 0.73           | 0.60        | 0.84             | 0.69           | 0.64        | 0.75             | 0.54           | 0.54        | 0.68             |
| -n5         | 0.79           | 0.74        | 0.84             | 0.58           | 0.53        | 0.84             | 0.63           | 0.60        | 0.75             | 0.49           | 0.44        | 0.68             |
| -n5-r5      | 0.81           | 0.68        | 0.84             | 0.65           | 0.67        | 0.84             | 0.65           | 0.66        | 0.75             | 0.50           | 0.59        | 0.68             |
| -n5-r10     | 0.85           | 0.63        | 0.84             | 0.67           | 0.65        | 0.84             | 0.66           | 0.65        | 0.75             | 0.53           | 0.57        | 0.68             |
| -n5-r15     | 0.85           | 0.63        | 0.84             | 0.67           | 0.65        | 0.84             | 0.67           | 0.64        | 0.75             | 0.54           | 0.55        | 0.68             |
| -n5-r20     | 0.88           | 0.60        | 0.84             | 0.68           | 0.64        | 0.84             | 0.71           | 0.64        | 0.75             | 0.54           | 0.54        | 0.68             |
| -n4         | 0.79           | 0.74        | 0.84             | 0.61           | 0.53        | 0.84             | 0.63           | 0.62        | 0.75             | 0.50           | 0.46        | 0.68             |
| -n4-r5      | 0.81           | 0.69        | 0.84             | 0.64           | 0.67        | 0.84             | 0.69           | 0.66        | 0.75             | 0.51           | 0.60        | 0.68             |
| -n4-r10     | 0.85           | 0.64        | 0.84             | 0.68           | 0.65        | 0.84             | 0.70           | 0.64        | 0.75             | 0.54           | 0.58        | 0.68             |
| -n4-r15     | 0.87           | 0.61        | 0.84             | 0.71           | 0.65        | 0.84             | 0.72           | 0.62        | 0.75             | 0.55           | 0.56        | 0.68             |
| -n4-r20     | 0.88           | 0.61        | 0.84             | 0.72           | 0.64        | 0.84             | 0.72           | 0.63        | 0.75             | 0.55           | 0.56        | 0.68             |
| -n2         | 0.85           | 0.83        | 0.84             | 0.70           | 0.66        | 0.84             | 0.73           | 0.71        | 0.75             | 0.56           | 0.47        | 0.68             |
| -n2-r5      | 0.87           | 0.61        | 0.84             | 0.72           | 0.59        | 0.84             | 0.76           | 0.58        | 0.75             | 0.56           | 0.59        | 0.68             |
| -n2-r10     | 0.90           | 0.57        | 0.84             | 0.75           | 0.58        | 0.84             | 0.76           | 0.57        | 0.75             | 0.57           | 0.56        | 0.68             |
| -n2-r15     | 0.95           | 0.50        | 0.84             | 0.76           | 0.58        | 0.84             | 0.76           | 0.58        | 0.75             | 0.58           | 0.55        | 0.68             |
| -n2-r20     | 0.95           | 0.48        | 0.84             | 0.80           | 0.57        | 0.84             | 0.77           | 0.55        | 0.75             | 0.59           | 0.54        | 0.68             |
| -n1         | 1.34           | 1.34        | 0.84             | 1.05           | 1.03        | 0.84             | 1.00           | 1.01        | 0.75             | 0.75           | 0.55        | 0.68             |
| -n1-r5      | 1.31           | 0.06        | 0.84             | 1.02           | 0.02        | 0.84             | 0.96           | 0.00        | 0.75             | 0.74           | 0.53        | 0.68             |
| -n1-r10     | 1.30           | 0.05        | 0.84             | 1.03           | 0.01        | 0.84             | 0.95           | 0.01        | 0.75             | 0.74           | 0.52        | 0.68             |
| -n1-r15     | 1.30           | 0.14        | 0.84             | 1.03           | 0.01        | 0.84             | 0.95           | 0.02        | 0.75             | 0.74           | 0.52        | 0.68             |
| -n1-r20     | 1.32           | 0.17        | 0.84             | 1.02           | 0.07        | 0.84             | 0.96           | 0.00        | 0.75             | 0.74           | 0.51        | 0.68             |
| -k0.1       | 0.74           | 0.67        | 0.84             | 0.58           | 0.51        | 0.84             | 0.63           | 0.58        | 0.75             | 0.48           | 0.77        | 0.68             |
| -k0.1-r5    | 0.77           | 0.69        | 0.84             | 0.70           | 0.62        | 0.84             | 0.63           | 0.68        | 0.75             | 0.51           | 0.00        | 0.68             |
| -k0.1-r10   | 0.79           | 0.67        | 0.84             | 0.70           | 0.61        | 0.84             | 0.63           | 0.68        | 0.75             | 0.52           | 0.00        | 0.68             |
| -k0.1-r15   | 0.80           | 0.67        | 0.84             | 0.72           | 0.59        | 0.84             | 0.67           | 0.66        | 0.75             | 0.53           | 0.00        | 0.68             |
| -k0.1-r20   | 0.82           | 0.64        | 0.84             | 0.72           | 0.59        | 0.84             | 0.68           | 0.67        | 0.75             | 0.53           | 0.00        | 0.68             |
| -k0.2       | 0.76           | 0.68        | 0.84             | 0.57           | 0.51        | 0.84             | 0.62           | 0.57        | 0.75             | 0.48           | 0.44        | 0.68             |
| -k0.2-r5    | 0.78           | 0.67        | 0.84             | 0.70           | 0.61        | 0.84             | 0.62           | 0.69        | 0.75             | 0.51           | 0.59        | 0.68             |

|                  |      |      |      |      |      |      |      |      |      |      |      |      |
|------------------|------|------|------|------|------|------|------|------|------|------|------|------|
| <b>-k0.2-r10</b> | 0.78 | 0.66 | 0.84 | 0.71 | 0.60 | 0.84 | 0.66 | 0.68 | 0.75 | 0.52 | 0.57 | 0.68 |
| <b>-k0.2-r15</b> | 0.80 | 0.64 | 0.84 | 0.72 | 0.59 | 0.84 | 0.67 | 0.67 | 0.75 | 0.53 | 0.56 | 0.68 |
| <b>-k0.2-r20</b> | 0.81 | 0.62 | 0.84 | 0.73 | 0.59 | 0.84 | 0.68 | 0.66 | 0.75 | 0.53 | 0.54 | 0.68 |
| <b>-k0.5</b>     | 0.74 | 0.67 | 0.84 | 0.57 | 0.51 | 0.84 | 0.64 | 0.62 | 0.75 | 0.48 | 0.44 | 0.68 |
| <b>-k0.5-r5</b>  | 0.76 | 0.70 | 0.84 | 0.66 | 0.62 | 0.84 | 0.64 | 0.65 | 0.75 | 0.51 | 0.59 | 0.68 |
| <b>-k0.5-r10</b> | 0.79 | 0.68 | 0.84 | 0.68 | 0.61 | 0.84 | 0.64 | 0.65 | 0.75 | 0.52 | 0.57 | 0.68 |
| <b>-k0.5-r15</b> | 0.81 | 0.65 | 0.84 | 0.69 | 0.59 | 0.84 | 0.69 | 0.65 | 0.75 | 0.53 | 0.56 | 0.68 |
| <b>-k0.5-r20</b> | 0.82 | 0.64 | 0.84 | 0.69 | 0.62 | 0.84 | 0.70 | 0.65 | 0.75 | 0.55 | 0.55 | 0.68 |
| <b>-k1.0</b>     | 0.78 | 0.71 | 0.84 | 0.62 | 0.55 | 0.84 | 0.70 | 0.62 | 0.75 | 0.49 | 0.44 | 0.68 |
| <b>-k1.0-r5</b>  | 0.83 | 0.62 | 0.84 | 0.71 | 0.58 | 0.84 | 0.69 | 0.60 | 0.75 | 0.51 | 0.58 | 0.68 |
| <b>-k1.0-r10</b> | 0.85 | 0.64 | 0.84 | 0.73 | 0.57 | 0.84 | 0.69 | 0.58 | 0.75 | 0.53 | 0.57 | 0.68 |
| <b>-k1.0-r15</b> | 0.90 | 0.57 | 0.84 | 0.75 | 0.56 | 0.84 | 0.71 | 0.57 | 0.75 | 0.54 | 0.56 | 0.68 |
| <b>-k1.0-r20</b> | 0.94 | 0.53 | 0.84 | 0.76 | 0.54 | 0.84 | 0.71 | 0.58 | 0.75 | 0.54 | 0.55 | 0.68 |
